# Supplementary material
Source: Springer Nature journal article supplement (https://www.springermedizin.de/resource/supplementary/13046_2011_487_MOESM3_ESM.pdf/9662336)

A

GES-1

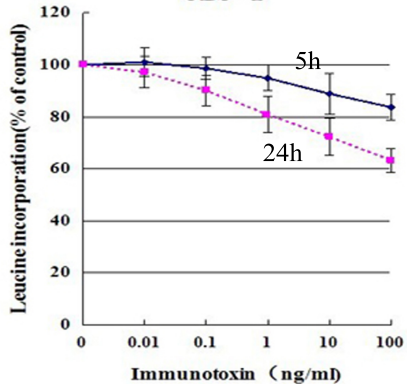

B

MKN-45

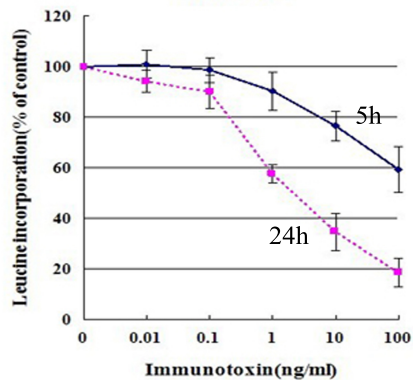

C

SGC7901

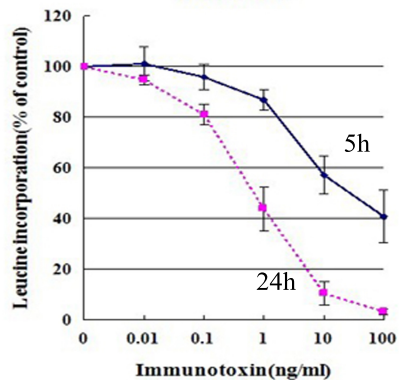

Supplement: MOESM3 [file 9662336]
